# Supplementary material for: The Acute Antiallodynic Effect of Tolperisone in Rat Neuropathic Pain and Evaluation of Its Mechanism of Action
Source: MDPI journal article supplement (doi:10.3390/ijms23179564), 2022-08-24
Supplement: s1 [file s1]

**Supplementary Figure S1.** The effect of oral administration of tolperisone (150 mg/kg) compared to saline-treatment. Columns represent the time latency of animals in sec  $\pm$  S.E.M. at 60, 120 and 180 min post-treatment in rotarod test.

*No significant differences were found between any groups (one-way ANOVA,  $F(5, 24) = 1.059$ ,  $P = 0.4073$ ). In each treatment group 4-5 animals were used.*
